# Supplementary material
Source: ML conference proceedings conference paper supplement (https://openreview.net/forum?id=IfSlU09GtRv)
Supplement: supplementary_material [file attachment]

## Motivation

- Current solutions of PDE numerical solvers are challenging to interpret.
- Limited exploration of Symbolic Regression to get analytical expressions for a system of PDEs

## Our Contribution

- End to End framework for obtaining mathematical expression for a system of PDEs using Differentiable Program Architecture (DPA)
- Components of Framework
  - Extracting Expressions based on Differentiable Program Architecture
  - Pruning based on Depth First Search (DFS)

## Methodology

PDE Solver

Data Generation  
with PDE Solver

Regression  
with DPA

DFS based  
Pruning

### Algorithm: Depth First Search Pruning Strategy of Differentiable Program Architecture

- 1 : **Global initialize**  $W \leftarrow$  Unpruned DPA weights,  $\text{loss} \leftarrow \text{SCORE}(W)$
- 2 : **Function** DFS (node)
- 3 : **Initialize**  $\text{visited} \leftarrow \text{node}, \text{children} \leftarrow$  children of node sorted by absolute value
- 4 : **if**  $\text{children}$  is *None* **then**
- 5 :      $W' \leftarrow \text{PRUNE}(\text{node})$
- 6 :      $W' \leftarrow \text{FINETUNE}(W')$
- 7 :      $\text{finetuned-loss} \leftarrow \text{SCORE}(W')$
- 8 :     **if**  $\text{finetuned-loss} \leq \text{loss}$  **then**
- 9 :          $\text{loss} \leftarrow \text{finetuned-loss}$
- 10 :          $W \leftarrow W'$
- 11 :     **end if**
- 12 :     **Return**  $W, \text{loss}$
- 13 : **end if**
- 14 : **for all**  $\text{child}$  in  $\text{children}$  **do**
- 15 :     **if**  $\text{child}$  not in  $\text{visited}$  **then**
- 16 :         DFS( $\text{child}$ )
- 17 :     **end if**
- 18 : **end for**

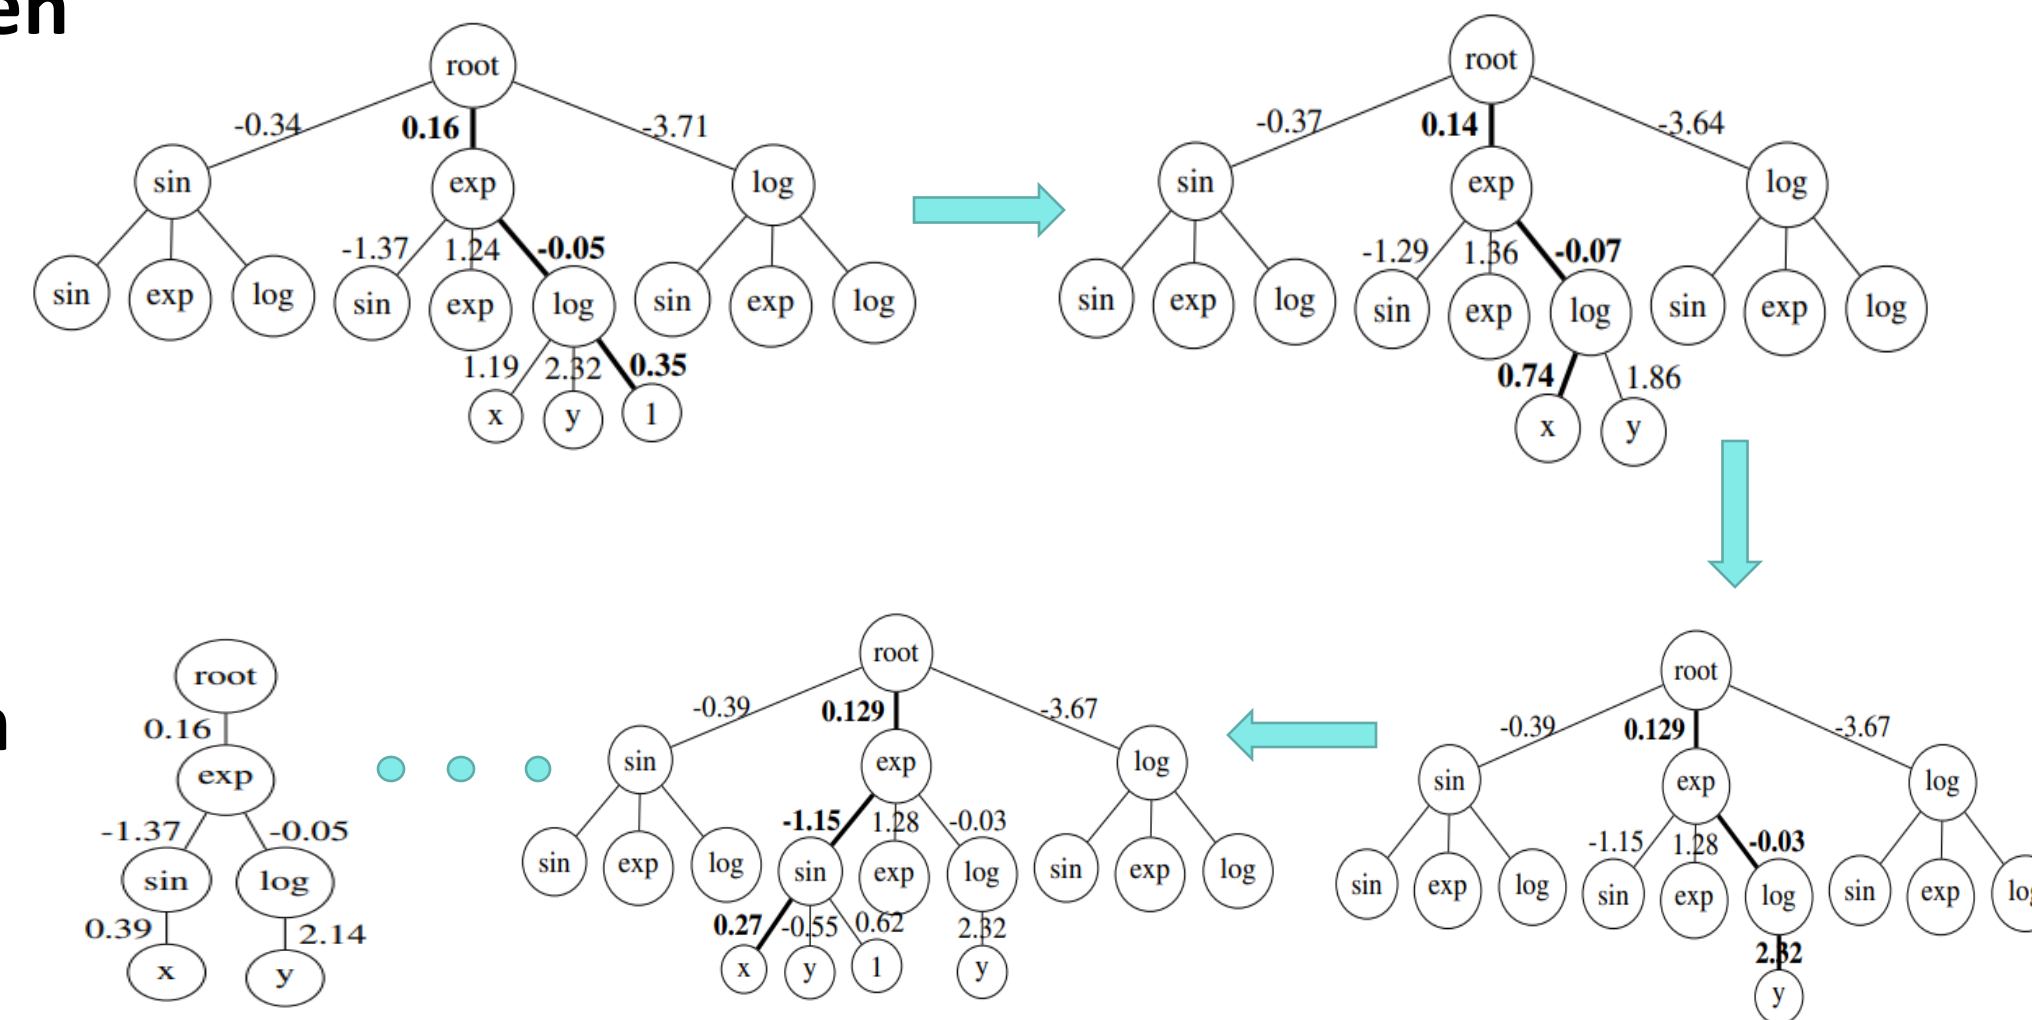

## Example Case Studies\*

### Diffusion Equation

#### Governing Equations

$$u_t = u_{xxx} - e^{-t} \sin(\pi x)(1 - \pi^2)$$

$$u(x, 0) = \sin(\pi x)$$

$$u(-1, t) = u(1, t) = 0$$

#### Ground Truth Expression

$$u_{true} = e^{-t} \sin(\pi x)$$

#### DFS Pruned Expression

$$u = (1.51x - 2.04 \sin(-2.51x + 0.20t))(2.62x + 0.32t) + 3.67 \sin(1.30 \sin(0.37t + 1.63) + 3.13x) - 3.53$$

### Kovaszny Flow

#### Governing Equations

$$u \cdot \nabla u + \nabla p = \nu \Delta u \text{ in } [0, 1]^2$$

$$\text{div}(u) = 0 \text{ in } [0, 1]$$

#### Ground Truth Expression

$$u_{true} = 1 - e^{\lambda x} \cos(2\pi y)$$

$$v_{true} = \lambda e^{\lambda x} \sin(2\pi y) / 2\pi$$

$$p_{true} = (1 - e^{2\lambda x}) / 2$$

#### DFS Pruned Expression

$$u = 1.01 + 0.99 e^{-1.81x} \sin(6.28y - 1.57)$$

$$v = \sin(6.28y - 3.14)(0.29 - 0.54x + 0.46x^2 - 0.28x^3 + 0.12x^4)$$

$$p = -2x^4 + 4.38x^3 - 3.75x^2 + 1.81x + 0.02$$

### Industrial Heat Exchanger

#### Governing Equations

For  $j = 1, 2, 3$

$$\frac{\partial T_{m_j}}{\partial \varphi} = NTU_{m_j} (T_j - T_{m_j}) + \frac{1}{Pe_{m_j}} \frac{\partial^2 T_{m_j}}{\partial z^2}$$

$$\frac{\partial T_j}{\partial z} = NTU_{m_j} (T_{m_j} - T_j)$$

$$T_j(\varphi, z = 0) = T_{in,j}$$

$$T_{m_1}(\varphi = 0, z) = T_{m_3}(\varphi = 1, 1 - z)$$

$$T_{m_1}(\varphi = 1, z) = T_{m_2}(\varphi = 0, 1 - z)$$

$$T_{m_2}(\varphi = 1, z) = T_{m_3}(\varphi = 0, z)$$

#### Ground Truth Expression

Finite Difference Based Numerical Solver

#### DFS Pruned Expression

$$T_{fg} = 0.99 \sin(0.22z + 0.83e^{-0.21z+0.61\theta+0.66})$$

$$T_{mg} = (0.52 \sin(1.56\theta) + 1.18)(0.83e^{-0.44\theta} + 0.18z\theta - 0.23\theta^2 - 0.27\theta)$$

$$T_{fa1} = (-0.11z + 0.77\theta - 1.59 + 0.27(z\theta))(0.03z + 0.22\theta - 0.60 + 0.37\theta^2)$$

$$T_{ma1} = (-1.14 \sin(0.07z + 0.88\theta - 1.06))(0.06z + 0.69\theta + 0.97)$$

$$T_{fa2} = 0.86 \sin(0.34z + 1.26\theta + 0.55)(-0.10z - 1.02\theta)(0.11z + 1.10\theta) + 0.96$$

$$T_{ma2} = (0.13z + 1.30 \sin(1.08\theta) + 1.25)(0.08z - 0.68\theta + 0.77)$$

\*Case studies Equations for Taylor-Green Vortex and Diffusion Reaction Equation can be referred through paper

## Comparison with State of the Art Methods

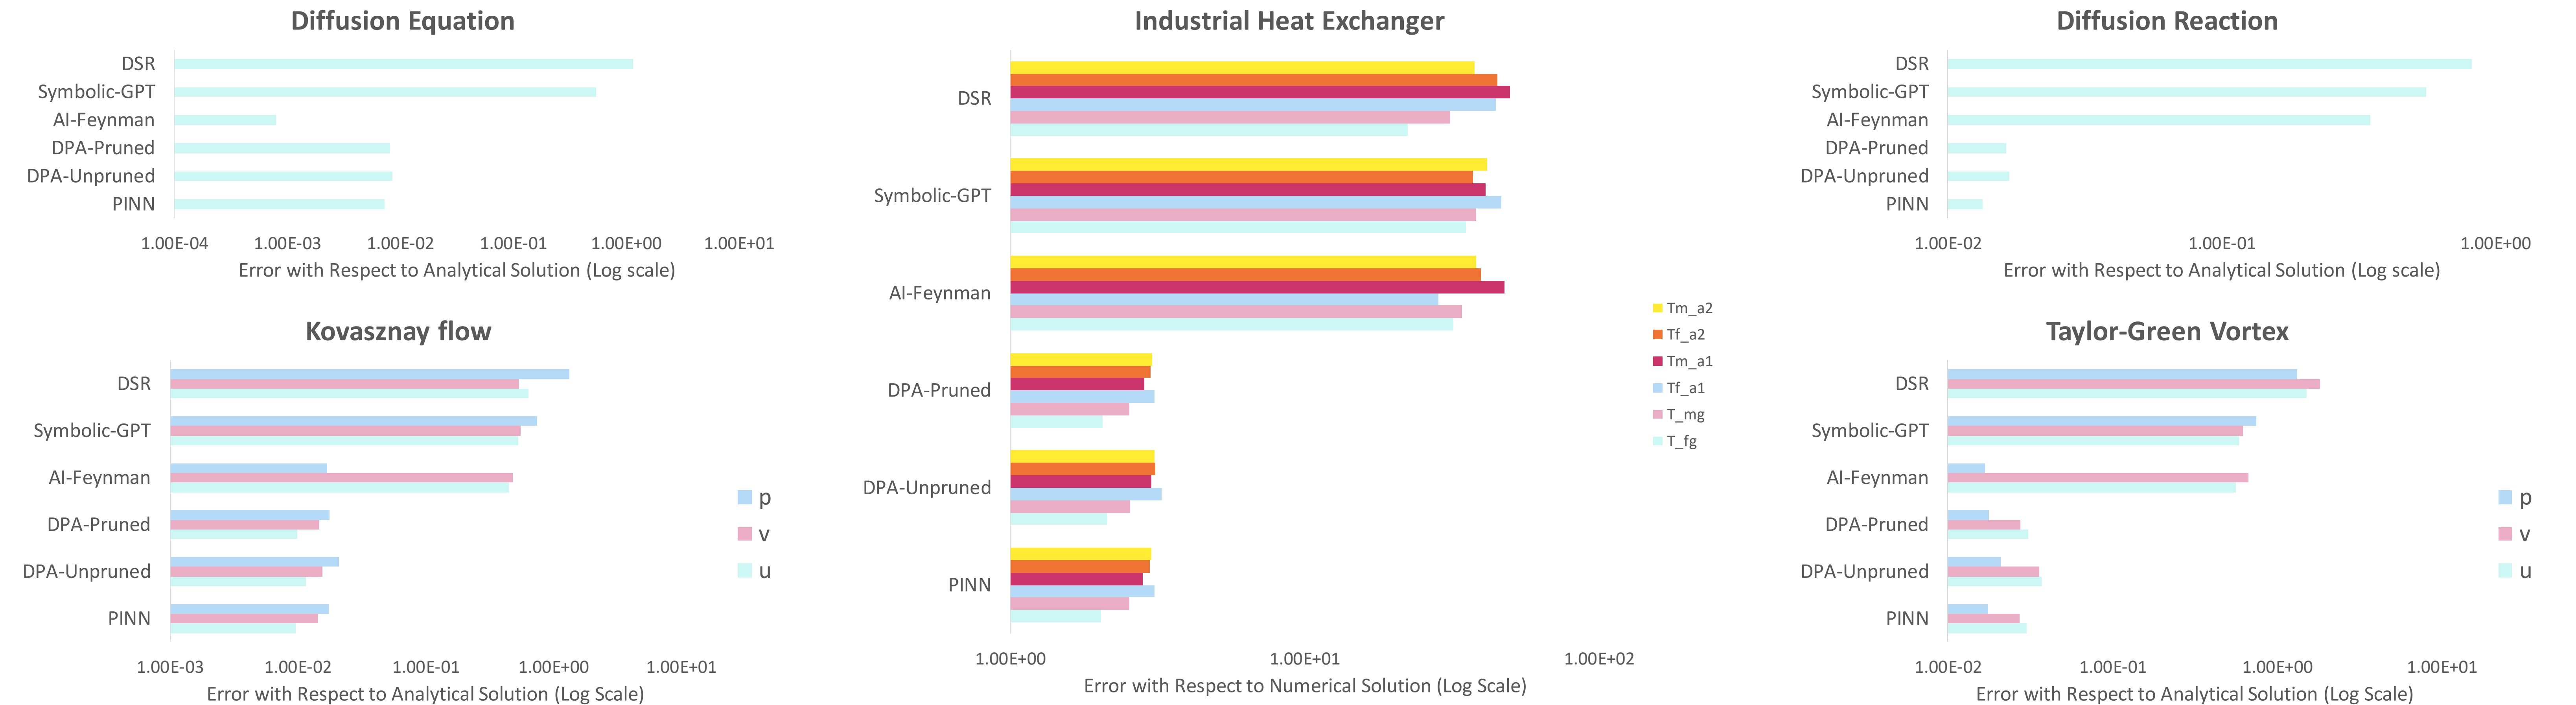

## References

- Cui et al. "Differentiable Synthesis of Program Architectures" Advances in Neural Information Processing Systems 2021
- Majumdar et al. "Physics informed Symbolic Networks":DLDE Workshop in Neural Information Processing Systems 2022
- Jadhav et al: "Physics informed neural network for health monitoring of an air preheater. PHM Society European Conference, 7(1), 07 2022."

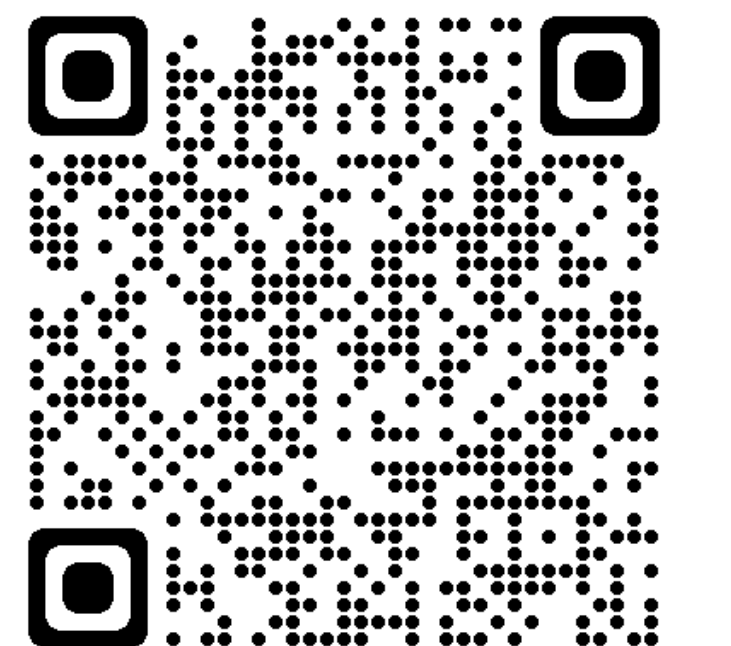

Find our paper here!
